RESEARCH ARTICLE

# A mixture of ginger phenolic compounds enhances mitochondrial function, activates AMPK, and reduces lipid accumulation in adipocytes

María Elizabeth Preciado-Ortiz<sup>1,2</sup>, Berenice Pérez-Jiménez<sup>3</sup>, Paulina Barrera-Gómez<sup>3</sup>, Juan José Rivera-Valdés<sup>2</sup>, Joshua Ayork Acevedo-Carabantes<sup>3</sup>, Sarai Vásquez-Reyes<sup>3</sup>, Armando R. Tovar<sup>3</sup>, Nimbe Torres<sup>3</sup>, Ivan Torre-Villalvazo<sup>3\*</sup>, Erika Martínez-López<sup>2\*</sup>

**1** Doctorado en Ciencias de la Nutrición Traslacional, Departamento de Clínicas de la Reproducción Humana, Crecimiento y Desarrollo Infantil, Centro Universitario de Ciencias de la Salud, Universidad de Guadalajara, Guadalajara, Jalisco, Mexico, **2** Instituto de Nutrigenética y Nutrigenómica Traslacional, Departamento de Biología Molecular y Genómica, Centro Universitario de Ciencias de la Salud, Universidad de Guadalajara, Guadalajara, Jalisco, Mexico, **3** Departamento de Fisiología de la Nutrición, Instituto Nacional de Ciencias Médicas y Nutrición Salvador Zubirán, Ciudad de México, Mexico

\* [ivan.torrev@incmnsz.mx](mailto:ivan.torrev@incmnsz.mx) (IT-V); [erika.martinez@academicos.udg.mx](mailto:erika.martinez@academicos.udg.mx) (EM-L)

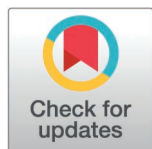

## OPEN ACCESS

**Citation:** Preciado-Ortiz ME, Pérez-Jiménez B, Barrera-Gómez P, Rivera-Valdés JJ, Acevedo-Carabantes JA, Vásquez-Reyes S, et al. (2025) A mixture of ginger phenolic compounds enhances mitochondrial function, activates AMPK, and reduces lipid accumulation in adipocytes. PLoS One 20(6): e0326690. <https://doi.org/10.1371/journal.pone.0326690>

**Editor:** Armania Nurdin, Universiti Putra Malaysia, MALAYSIA

**Received:** February 5, 2025

**Accepted:** June 3, 2025

**Published:** June 27, 2025

**Copyright:** © 2025 Preciado-Ortiz et al. This is an open access article distributed under the terms of the [Creative Commons Attribution License](https://creativecommons.org/licenses/by/4.0/), which permits unrestricted use, distribution, and reproduction in any medium, provided the original author and source are credited.

**Data availability statement:** All relevant data are within the manuscript.

**Funding:** We want to thank the Programa de Incorporación y Permanencia de Posgrado

## Abstract

Mitochondrial abundance and activity in adipocytes are critical for adequate adipose tissue function and whole-body energy homeostasis. Mitochondrial dysfunction in adipocytes impairs lipid metabolism, insulin sensitivity, and thermogenesis, leading to metabolic diseases. Enhancing mitochondrial function and density in adipose tissue may provide a promising therapeutic approach for metabolic diseases. This study evaluates the effects of a ginger phenol mixture on mitochondrial density and function, AMPK activation, lipid droplet content, and lipolysis markers in adipocytes differentiated *in vitro*. Pre-adipocytes isolated from the inguinal adipose tissue of Wistar rats were differentiated and assigned to three experimental groups: vehicle (0.2% DMSO), gingerol mixture (6 µg/mL), and positive control (1 mmol/m<sup>3</sup> AMPK activator 5-Aminoimidazole-4-carboxamide ribonucleoside). Mitochondrial density and lipid content were assessed by MitoTracker and Bodipy staining respectively, while mitochondrial respiration was evaluated in an Extracellular Flux Analyzer. Protein abundance and basal lipolysis were evaluated by Western blotting and free fatty acids determination in supernatant, respectively. The gingerol mixture significantly enhanced mitochondrial density and respiration, including both maximal and ATP-linked capacities. Additionally, it activated AMPK, upregulated the expression of mitochondrial complexes, enhanced lipolysis markers, and reduced lipid droplet content. These findings suggest that the gingerol mixture enhances mitochondrial function, stimulates lipolysis, and reduces lipid accumulation in adipocytes, contributing to metabolic homeostasis in adipose tissue. This highlights its potential use as a complementary therapeutic agent for the management of obesity.

2023 (PROINPEP) and the Consejo Nacional de Humanidades, Ciencia y Tecnología (CONAHCYT) for the scholarship for the student M.E.P.-O. (1034591). The funders had no role in study design, data collection and analysis, decision to publish, or preparation of the manuscript.

**Competing interests:** The authors have declared that no competing interests exist.

## Introduction

Adipose tissue serves as the primary energy reservoir in the body and plays a crucial role in the regulation of energy metabolism [1,2]. Under conditions of excess energy, adipose tissue stores the superabundant nutrients in the form of triglycerides. Conversely, during periods of energy scarcity, it supplies nutrients to other tissues through lipolysis, releasing free fatty acids [1–3].

Adipose tissue participates in the maintenance of whole-body energy homeostasis, and its function is significantly influenced by both the quantity and functionality of mitochondria [4,5]. Mitochondria generate cellular energy in the form of adenosine triphosphate (ATP) through glucose and lipid metabolism and produce several biosynthetic intermediates [6]. Furthermore, within adipose tissue, the activity of this organelle determines critical adipocyte functions including adipogenesis and thermogenesis. It also maintains insulin sensitivity, facilitates glucose and lipid metabolism, and participates in the crosstalk between adipose tissue and peripheral tissues, such as muscle and liver [4,7]. Conversely, mitochondrial dysfunction results in oxidative stress, cell death and inflammation in adipocytes, which promote detrimental effects on adipocyte differentiation, lipid metabolism, insulin sensitivity, oxidative capacity, and thermogenesis [6–8]. These alterations subsequently contribute to metabolic diseases such as insulin resistance, dyslipidemia, type 2 diabetes mellitus, arterial hypertension, and cardiovascular diseases [4,6].

Recent studies have suggested that enhancing mitochondrial function and increasing mitochondrial density in adipose tissue may represent a promising therapeutic strategy for the prevention and treatment of obesity and related metabolic disorders [5,7]. One key mechanism for stimulating mitochondrial biogenesis and functionality involves the activation of adenosine monophosphate-activated protein kinase (AMPK) [7]. Phosphorylation of AMPK promotes the activation of peroxisome proliferator-activated receptor gamma coactivator 1-alpha (PGC1α), which in turn enhances the expression of essential transcription factors for mitochondrial biogenesis and organelle functionality [9]. AMPK is activated by increased intracellular AMP levels, as seen during fasting and energy-demanding periods, such as exercise. Interestingly, AMPK can also be activated by small molecules, such as 5-Aminoimidazole-4-carboxamide ribonucleoside (AICAR), as well as bioactive food compounds [7].

Ginger (*Zingiber officinale Roscoe*) is widely recognized as a culinary spice and has been recommended for the treatment of obesity-related diseases [10]. The ginger root contains approximately 400 bioactive compounds, predominantly comprising gingerols, shogaols, and paradols [11]. In fresh rhizomes, the most abundant compounds are 6-, 8-, and 10-gingerol, while dried ginger primarily contains 6-, 8-, and 10-shogaols [12,13]. Studies in obese rats have demonstrated that administration of 6-gingerol leads to reductions in body weight and adipocyte size, downregulation of lipogenic and adipogenic gene expression, as well as improvements in insulin sensitivity and lipid profiles [14,15]. Furthermore, several in vitro studies using 3T3-L1 adipocytes have shown that various ginger-derived phenolic compounds modulate lipid metabolism by regulating key transcription factors involved in adipogenesis [16,17]

and lipogenic enzymes [12,18,19]. Additionally, certain gingerols have been shown to regulate the activity of AMPK, which is associated with reduced fat accumulation and plays a role in mitigating endoplasmic reticulum stress [8,10].

However, the effect of a mixture of the main ginger phenols (6-gingerol, 8-gingerol, 10-gingerol, 6-shogaol, 8-shogaol, and 10-shogaol) on AMPK activation and mitochondrial function markers in adipocytes has not been thoroughly investigated. Therefore, the present study aimed to explore the impact of this ginger phenol mixture on mitochondrial density and function, AMPK activation, lipid droplet content, and lipolysis markers in adipocytes differentiated in vitro.

## Materials and methods

### Animals

Male albino rats (*Rattus norvegicus*, Wistar strain), weighing 150–200 g (6 months old), were obtained from the Experimental Research Department and Animal Care Facility at the Instituto Nacional de Ciencias Médicas y Nutrición Salvador Zubirán (DIEB-INCMNSZ). The rats were housed under a 12-h light/12-h dark cycle at 22 °C and had ad libitum access to standard laboratory chow. The experimental protocol was carried out in strict accordance with the recommendations in the Guide for the Care and Use of Laboratory Animals of the Committee for the Care and Use of Laboratory Animals (CICUAL) at the INCMNSZ. The protocol was approved by the CICUAL (Protocol Number: CICUAL-FNU-2141-25-26-1). Adipose tissue collection was performed after euthanasia by sevoflurane overdose, and all efforts were made to minimize suffering.

### Pre-adipocyte isolation and adipocyte differentiation

The experimental design for the primary cell culture is illustrated in Fig 1. Pre-adipocytes were isolated from the stromal vascular fraction (SVF) of the inguinal adipose tissue collected from two male Wistar rats. After euthanasia by sevoflurane overdose, adipose tissue was washed twice with phosphate-buffered saline (PBS) to remove red blood cells and tissue debris. Then, it was fragmented into small pieces and digested using 0.5% type IV collagenase (Gibco Life Technologies, Grand Island, NY, USA) at 37 °C for 20 min with gentle shaking. After digestion, the cells were centrifuged at 700 × g for 5 min, and the supernatant was discarded. The SVF pellet was resuspended in PBS and filtered through a 100-μm cell strainer (Corning Inc., Corning, NY, USA). The suspension was centrifuged again at 700 × g for 5 min, and the SVF pellet was resuspended in DMEM/F-12 (Gibco Life Technologies, Grand Island, NY, USA). The SVF cells were then seeded in a flask containing complete medium, which consisted of DMEM/F-12 supplemented with 10% fetal bovine serum (Gibco Life Technologies, Grand Island, NY, USA) and 1% antibiotic/antimycotic mixture (Caisson Labs, Smithfield, UT, USA), and maintained at 37 °C in a 5% CO<sub>2</sub> environment.

For adipocyte differentiation, the pre-adipocytes from the SVF were seeded in 6-well plates (Corning Inc, Somerville, MA, USA), and the medium was replaced every 48 h until the cells reached 80% confluence. Upon reaching confluence, cells were differentiated in complete medium supplemented with 1 mmol/m<sup>3</sup> dexamethasone (Sigma-Aldrich Merck, Darmstadt, Germany), 1 mmol/m<sup>3</sup> insulin (Sigma-Aldrich Merck, Darmstadt, Germany), 0.5 mol/m<sup>3</sup> isobutylmethylxanthine (Sigma-Aldrich Merck, Darmstadt, Germany), and 1 mmol/m<sup>3</sup> rosiglitazone (Sigma-Aldrich Merck, Darmstadt, Germany). After 72 h of differentiation, the medium was replaced with maturation medium, which contained complete medium with 1 mmol/m<sup>3</sup> insulin (Sigma-Aldrich Merck, Darmstadt, Germany). The maturation medium was changed every 48 h for an additional 5 d. The total duration of adipogenesis was 8 d, starting from the initiation of differentiation.

### Mixture of ginger phenolic compounds

A mixture of gingerols and shogaols was obtained from Merck KGaA (cat. no. SIG-G-027-1ML). This solution contained the main phenolic compounds in ginger. The ginger phenolic compounds mixture was prepared by combining 500 μg/mL each of 6-, 8-, and 10-gingerol and 6-, 8-, and 10-shogaol, resulting in a 1:1 (w/v) ratio of gingerols to shogaols (gingerol mixture). Dilutions were prepared to achieve a final concentration of 6 μg/mL in dimethyl sulfoxide (DMSO; Sigma-Aldrich; Merck KGaA; cat. no. 276855-1L).

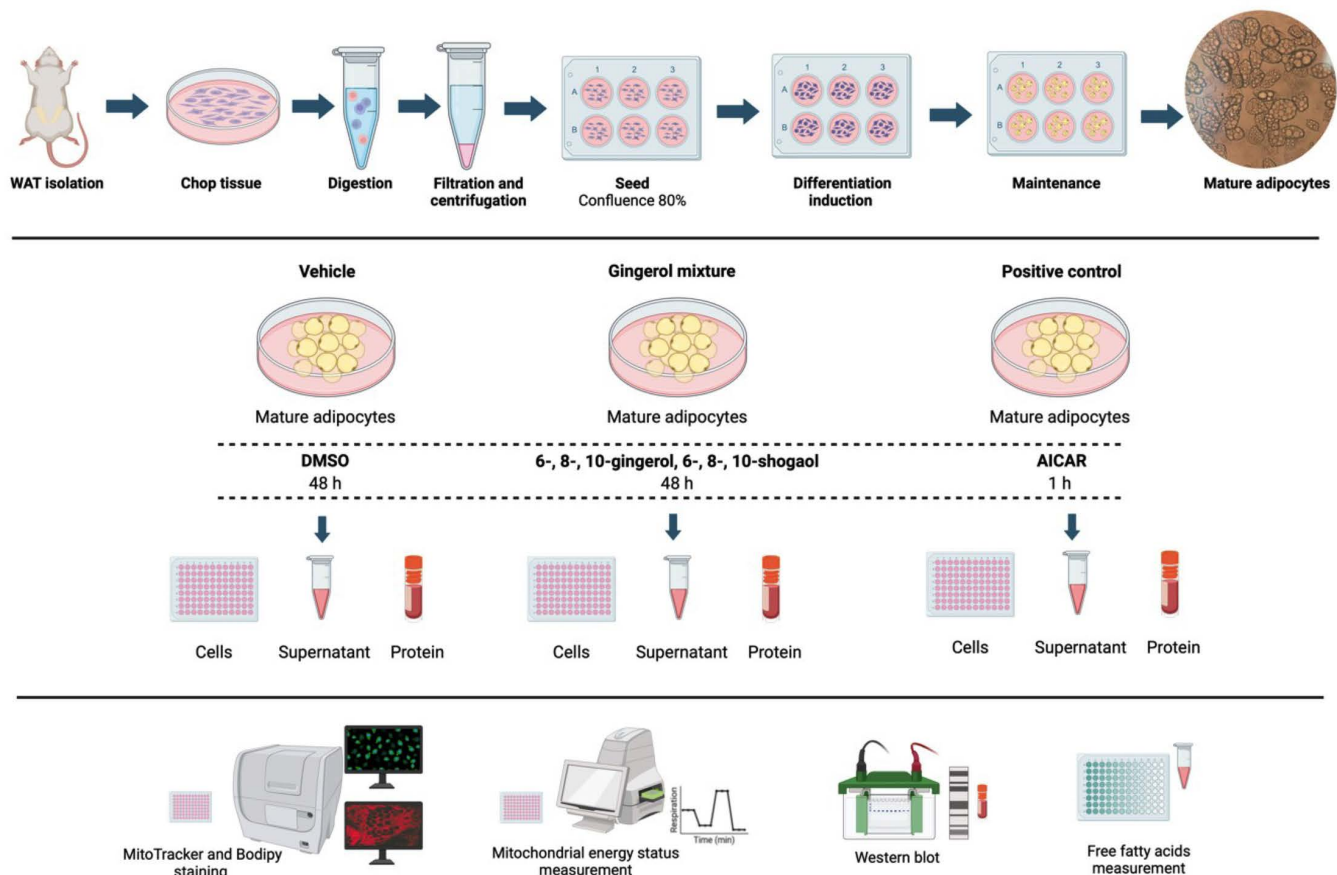

**Fig 1. Experimental design.** Primary cell culture of adipocytes was derived from the stromal vascular fraction (SVF) of the inguinal adipose tissue from Wistar rats. Mature adipocytes were divided into three experimental conditions: a vehicle control (DMSO), a gingerol mixture (comprising 6-, 8-, and 10-gingerol, 6-, 8-, and 10-shogaol) and a positive control (AICAR). In all groups, cells were stained with MitoTracker and Bodipy to assess mitochondrial density and lipid content. A mitochondrial stress assay was conducted to determine mitochondrial respiration. Protein abundance was analyzed using Western blotting, and the supernatant was collected to measure the content of free fatty acids.

<https://doi.org/10.1371/journal.pone.0326690.g001>

## Adipocyte treatment

Differentiated adipocytes were divided into three experimental conditions: Vehicle, treated with 0.2% DMSO for 48 h; Gingerol mixture, treated with 6 µg/mL gingerol mixture for 48 h and a positive control, treated with 1 mol/m<sup>3</sup> AICAR for 60 min. Each condition was subjected to testing in three technical replicates (wells per condition), and the entirety of the experiment was conducted twice utilising cells obtained from individual rats (biological replicates) (Fig 1).

## Mitochondrial energy status measurement

Mitochondrial respiration in differentiated adipocytes was assessed using the Seahorse XF Cell Mito Stress Test Kit (Agilent, Santa Clara CA, USA) with the XFe96 Extracellular Flux Analyzer (Agilent Technologies, Santa Clara CA, USA).

After 72 h of differentiation, adipocytes were trypsinised and plated in XFe96 microplates (Agilent Technologies, Santa Clara CA, USA) at a density of 15,000 cells per well and maintained in maturation medium for an additional 5 d and treated according to their designated experimental conditions (Vehicle, Gingerol mixture, Positive control).

To measure mitochondrial energy status, cells were washed with XF basal medium (Agilent Technologies, Santa Clara, CA, USA) supplemented with 11 mol/m<sup>3</sup> glucose, 1 mol/m<sup>3</sup> pyruvate, and 2 mol/m<sup>3</sup> glutamine. The cells were then incubated for 1 h in a CO<sub>2</sub>-free incubator with the same medium. Mitochondrial respiration was assessed by sequentially injecting the following compounds: 2 mmol/m<sup>3</sup> oligomycin, 1 mmol/m<sup>3</sup> carbonyl cyanide-p-trifluoromethoxy phenylhydrazone (FCCP), and 1 mmol/m<sup>3</sup> rotenone/antimycin A (Agilent Technologies, Santa Clara, CA, USA). Oxygen consumption rate (OCR) measurements were obtained and analyzed according to the manufacturer's recommendations (Seahorse Bioscience, Agilent Technologies, Santa Clara, CA, USA).

OCR and ECAR were normalized by in situ cell counts using a BioTek Cytation 5 as follows: Immediately following XF analysis, cells were fixed using 4% paraformaldehyde and then stained with 4',6-diamidino-2-phenylindole (DAPI, Sigma-Aldrich). Cell images were captured using a 4x lens on the Cytation 1 (Agilent BioTek). The nuclear number was counted using the Cell Analysis function in the Gen5 software program, and data were exported to normalize XF data. All experiments were conducted in quintuplicate.

### Bodipy and MitoTracker staining

Adipocyte differentiation efficiency and total cell count were assessed using Bodipy (Invitrogen, Thermo Fisher Scientific, Waltham, MA, USA) and Hoechst (Thermo Fisher Scientific, Waltham, MA, USA) staining. For mitochondrial visualization, cells were stained with MitoTracker Deep Red FM (Thermo Fisher Scientific, Waltham, MA, USA). Adipocytes were incubated with 250 μmol/m<sup>3</sup> Bodipy, 2 mmol/m<sup>3</sup> Hoechst, and 50 μmol/m<sup>3</sup> MitoTracker Deep Red FM at 37 °C for 30 min. Fluorescence was quantified using the Cytation 1 Cell Imaging Multi-Mode Reader (BioTek, Winooski, VT, USA). The number of adipocytes was determined by calculating the ratio of differentiated adipocytes to the total number of precursor cells for each condition.

### Western blot analysis

At the end of the treatments, adipocytes were harvested by washing the cells with PBS buffer and subsequently lysed in RIPA buffer containing PBS, SDS, sodium deoxycholate, sodium azide, NP-40, and protease and phosphatase inhibitors. Total protein was obtained by centrifugation at 15,000 x g for 20 min at 4°C. Total proteins were separated by SDS-polyacrylamide gel electrophoresis and transferred to polyvinylidene difluoride membranes (Bio-Rad Laboratories, Hercules, CA, USA). Membranes were incubated overnight at 4°C with specific antibodies against AMPK, p-AMPK, p-HSL (1:1,000; Santa Cruz Biotechnology, Inc), and oxidative phosphorylation complexes (OXPHOS) (1:1000; Abcam, Cambridge, UK). Detection was achieved using anti-rabbit or anti-mouse secondary antibodies (1:20,000; Abcam, Cambridge, UK). The GAPDH antibody (1:40,000; Abcam, Cambridge, UK) was used as a loading control. Bands were visualized using Immobilon Western chemiluminescent HRP substrate (Millipore, Temecula, CA, USA). Chemiluminescence was digitized with the ChemiDoc MP imaging system (Bio Rad Laboratories, Hercules, CA) and analyzed with ImageJ 1.51 (100) 2015 software (NIH, USA).

### Free fatty acids measurement

Free fatty acids in the supernatants were quantified using the Free Fatty Acids Half Micro Test (Roche, St. Louis, MO, USA) according to the manufacturer's instructions. All experiments were performed in triplicate.

### Statistical analysis

Data are presented as means ± standard error of the mean (SEM) to represent the precision of the estimated mean across replicate wells (n=6). Statistical analyses were performed using one-way ANOVA followed by Tukey's post hoc test to assess differences among group means. All analyses were conducted using GraphPad Prism 9.0 (GraphPad, San Diego, CA, USA), and differences were considered statistically significant at p<0.05.



## Results

### Effects of a gingerol mixture on mitochondrial function in adipocytes

To investigate the effect of the main ginger phenols on mitochondrial function and energy production in adipose tissue, the OCR in adipocytes was assessed using a mitochondrial stress test. SVF cells derived from inguinal adipose tissue were cultured and differentiated into adipocytes. Once fully differentiated, the adipocytes were treated with 6 µg/mL of a gingerol mixture or DMSO (as a vehicle control) for 48 h. As shown in Fig 2, the gingerol mixture significantly enhanced maximal mitochondrial respiration, ATP-linked respiration, and reserve respiratory capacity, without affecting other mitochondrial parameters, such as proton leak or non-mitochondrial respiration. These findings suggest that the predominant phenolic compounds in ginger root enhance mitochondrial activity in mature adipocytes.

### The gingerol mixture increased mitochondrial abundance, promoted AMPK activation, and OXPHOS expression in adipocytes

To assess the effect of the gingerol mixture on mitochondrial density in adipocytes, the fluorescent dye MitoTracker was used. AICAR was used as a positive control, while DMSO served as the vehicle control. As expected, stimulation with AICAR significantly increased mitochondrial density compared to the vehicle. Notably, adipocytes treated with the gingerol mixture exhibited a higher mitochondrial density compared to the vehicle, with results similar to those observed in the positive control (Fig 3A, 3B).

Given that mitochondrial activity and abundance are partially regulated through AMPK activation, we investigated whether the increase induced by the gingerol mixture was mediated by AMPK activation. As shown in Fig 3C and 3D, treatment with AICAR resulted in increased AMPK phosphorylation, as expected. Importantly, the gingerol mixture also significantly enhanced AMPK phosphorylation compared to the vehicle, reaching levels comparable to those of the positive control.

Since AMPK signaling promotes mitochondrial biogenesis, we evaluated the abundance of proteins from mitochondrial complexes I, II, III, IV, and ATP synthase (collectively referred to as OXPHOS) in adipocytes using Western blot analysis. As observed in Fig 3C and 3E, the gingerol mixture increased the enzymatic components of the respiratory chain in adipocytes to levels similar to those observed with the positive control. These results indicate that the gingerol mixture enhances the abundance of mitochondrial complexes in adipocytes through AMPK activation.

### A gingerol mixture reduced adipocyte lipid droplet content and promotes lipolysis in adipocytes

To evaluate whether increased mitochondrial function leads to a reduction in lipid content in adipocytes, we assessed lipid droplet abundance using the fluorescent lipid dye Bodipy (Fig 4A, 4B). Adipocytes treated with the gingerol mixture exhibited fewer lipid droplets compared to both the vehicle and the positive control. These findings suggest that the gingerol mixture enhances fatty acid oxidation in adipocytes, thereby preventing excessive lipid accumulation.

In addition to the observed increase in mitochondrial fatty acid oxidation, the reduction in lipid droplet content in adipocytes treated with ginger phenols may also be attributed to enhanced lipolysis. Thus, we measured the abundance of phospho-HSL and the release of free fatty acids into the culture medium. As shown in Fig 4C and D, the gingerol mixture significantly increased HSL phosphorylation and, consequently, the abundance of free fatty acids in the culture medium compared to the vehicle, reaching levels comparable to those observed with AICAR. These results clearly demonstrate that AMPK activation by the gingerol mixture promotes HSL-dependent lipolysis in adipocytes.

## Discussion

The present study demonstrates that a gingerol mixture (comprising 6-, 8-, and 10-gingerol, as well as 6-, 8-, and 10-shogaol) enhances mitochondrial function and density, and promotes lipolysis in adipocytes, thereby reducing lipid

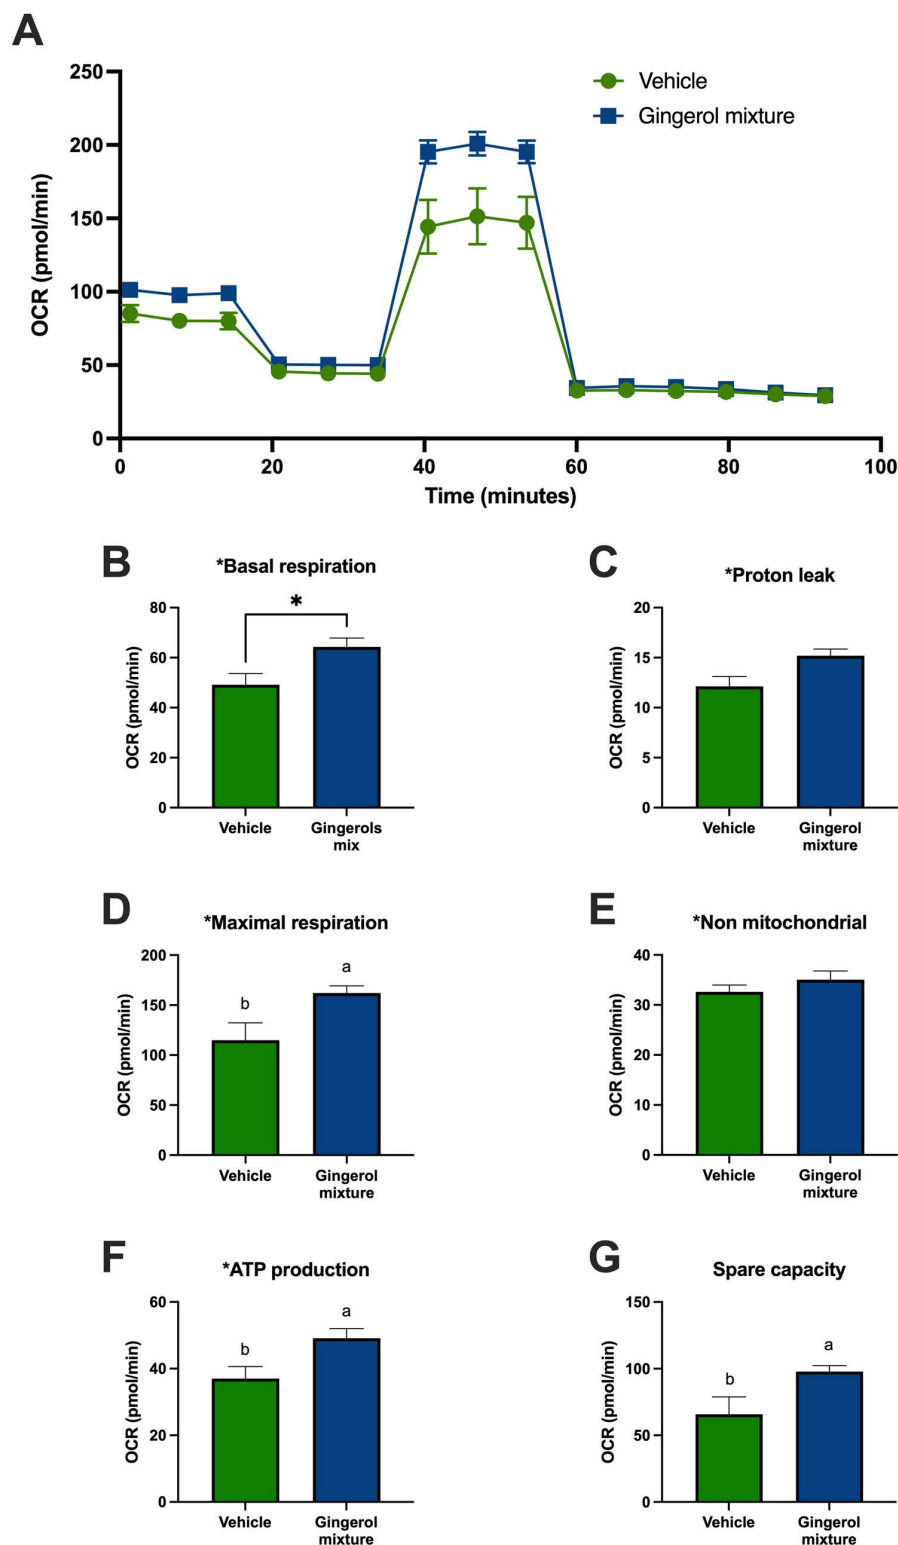

**Fig 2. Oxygen consumption rate (OCR) and the calculated mitochondrial parameters of adipocytes treated with either a gingerol mixture or DMSO (vehicle) for 48 h.** (A) OCR of adipocytes, (B) Basal respiration (C) Proton leak, (D) Maximal respiration, (E) Non-mitochondrial respiration, (F) ATP production, and (G) Spare capacity. Results are expressed as mean  $\pm$  SEM, with assays performed in quintuplicate. Differences among groups were analyzed using one-way ANOVA followed by Tukey's post-hoc test. Letters indicate significant differences between groups ( $a < b$ ),  $P < 0.05$ .

<https://doi.org/10.1371/journal.pone.0326690.g002>

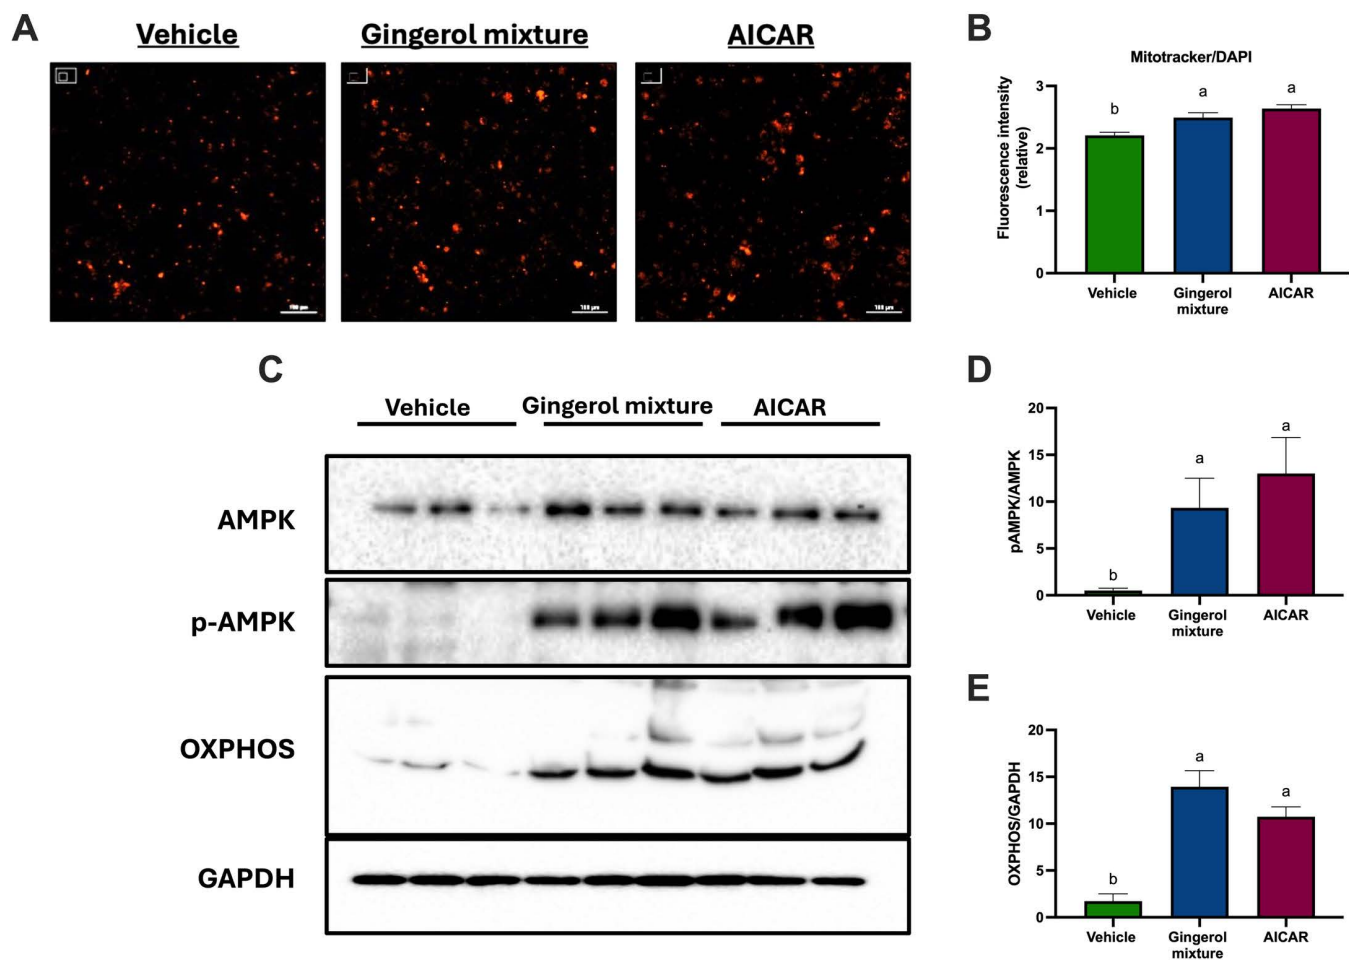

**Fig 3. Effects of a gingerol mixture on mitochondrial abundance, AMPK phosphorylation and the abundance of mitochondrial protein complexes in adipocytes treated for 48 h.** (A) MitoTracker fluorescence staining. (B) Relative fluorescence intensity of MitoTracker. (C) Immunoblot analysis of total AMPK, phospho-AMPK (p-AMPK), and oxidative phosphorylation complexes (OXPHOS). (D) Densitometric analysis of the pAMPK/AMPK ratio. (E) OXPHOS abundance in adipocytes. GAPDH was used as a loading control. The results are presented as mean  $\pm$  SEM, with assays performed in triplicate. Differences among groups were analyzed using one-way ANOVA followed by Tukey's post-hoc test. Letters indicate significant differences between groups (a < b),  $P < 0.05$ .

<https://doi.org/10.1371/journal.pone.0326690.g003>

accumulation. These effects were mediated by an increase in AMPK activity, which promotes mitochondrial biogenesis and elevated expression of mitochondrial machinery.

Adipocyte dysfunction, characterized by impaired mitochondrial function, oxidative stress and inflammation, plays a pivotal role in the early development of metabolic disturbances associated with obesity [7,8]. Recent studies have suggested that plant-derived bioactive compounds, such as gingerols, may have therapeutic potential in addressing these disturbances due to their effects on lipid metabolism, mitochondrial function, and anti-inflammatory properties [20]. In particular, these beneficial effects are closely related to mitochondrial functionality in adipose tissue [5,7].

Mitochondria are essential organelles involved in energy production and cellular oxidative metabolism, generating approximately 90% of cellular ATP through oxidative phosphorylation complexes (OXPHOS) [21]. The present study revealed that the gingerol mixture significantly enhanced mitochondrial function, as evidenced by increased maximal respiration, ATP-linked respiration, and reserve respiratory capacity. Additionally, the expression of OXPHOS machinery



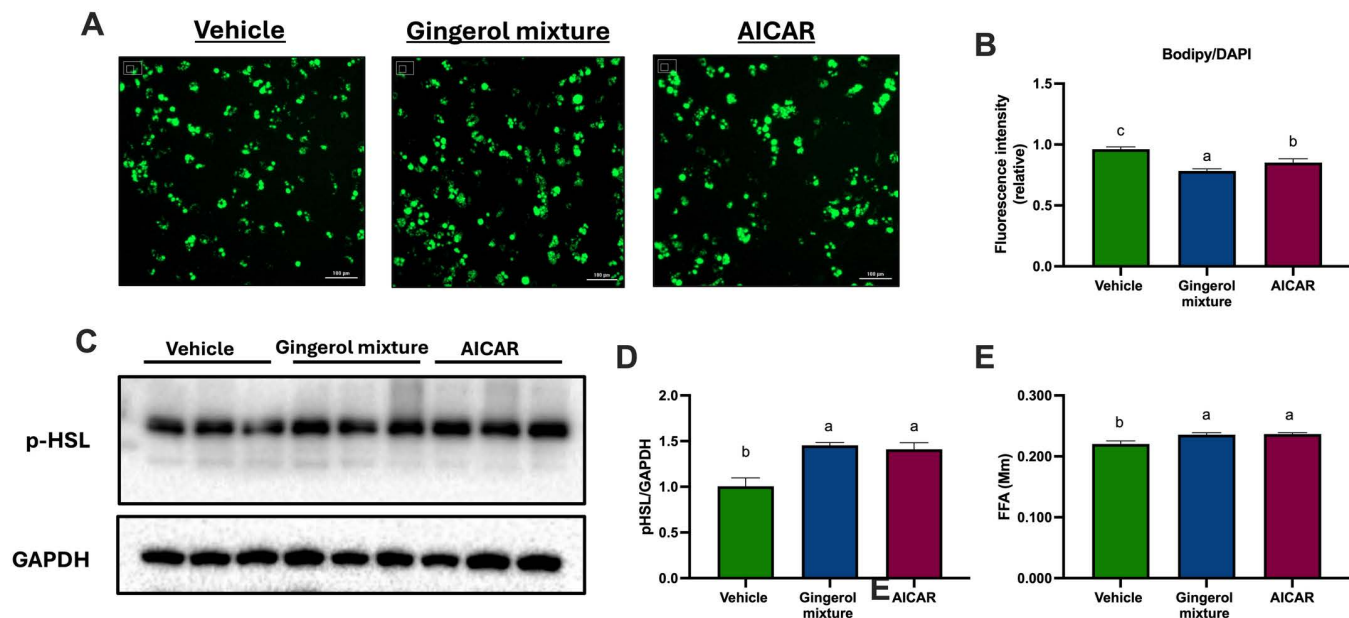

**Fig 4. Effect of the gingerol mixture on lipid accumulation and lipolysis in adipocytes treated for 48 h.** (A) Bodipy fluorescence staining. (B) Relative fluorescence intensity of Bodipy. (C) Immunoblot analysis of phospho-HSL (p-HSL). (D) Densitometric analysis of p-HSL. GAPDH was used as the loading control. (E) Measurement of free fatty acids released into the culture medium. Results are presented as means  $\pm$  SEM, with assays performed in triplicate. Differences among groups were analyzed using one-way ANOVA followed by Tukey's post-hoc test. Letters indicate significant differences between groups (a < b < c),  $P < 0.05$ .

<https://doi.org/10.1371/journal.pone.0326690.g004>

was upregulated, indicative of improved mitochondrial efficiency. These results are consistent with previous studies on capsaicin [22] and genistein [23] which have been shown to enhance mitochondrial respiration and energy expenditure in adipocytes [22,23]. Furthermore, this study demonstrated that the gingerol mixture increased mitochondrial abundance in adipocytes, corroborating findings from research on other polyphenols, such as quercetin and genistein, which have also been shown to promote mitochondrial biogenesis in 3T3-L1 cells [23,24].

Gingerols are well-known for their anti-obesity properties, particularly through their ability to modulate adipogenesis and lipid metabolism. Previous studies have shown that gingerol compounds reduce intracellular lipid accumulation and regulate the expression of key lipogenic genes in 3T3-L1 pre-adipocytes [16,18]. Consistent with these findings, this study demonstrated that treatment with a gingerol mixture significantly reduced lipid content in mature adipocytes. This reduction was accompanied by increased levels of free fatty acids in the supernatant, suggesting enhanced lipolysis. Moreover, the gingerol mixture increased phosphorylated hormone-sensitive lipase (p-HSL), a key regulator of lipolysis, further confirming its role in lipid breakdown [25].

The improvement in mitochondrial density and function, as well as reduction in lipid content and enhanced lipolysis observed in our study may be associated with the activation of AMPK, a central regulator of energy homeostasis. AMPK phosphorylation is known to promote mitochondrial biogenesis and enhance lipid catabolism [8,13]. Emerging evidence highlights the metabolic and vascular protective effects of ginger phenols, particularly 6- and 10-gingerol, by the activation of AMPK in various tissues, including adipose tissue [8,10]. In vascular injury models, 10-gingerol significantly reduced neointimal hyperplasia following carotid artery ligation via AMPK binding [10]. Similarly, 6-gingerol has shown robust activity in metabolic disease models: it improved insulin sensitivity, reduced hepatic steatosis and lipid accumulation, and alleviated inflammation and oxidative stress in high-fat diet-fed mice and palmitate-treated HepG2 cells [26,27]. In skeletal muscle and liver, 6-gingerol decreased lipid deposition and reactive oxygen species (ROS) production, while enhancing

mitochondrial membrane potential and respiratory capacity via AMPK/SIRT1/PGC-1 $\alpha$  signaling [28,29]. It also improved plasma metabolic profiles and adiponectin levels in female mice, and activated the AMPK/PGC-1 $\alpha$  pathway in adipose tissue of aging rats [30]. In the present study, the effect of the gingerol mixture on mitochondrial functionality and the reduction in lipid accumulation was likely due to the activation of AMPK. This is supported by previous findings showing that AMPK phosphorylation stimulates transcription factors involved in mitochondrial biogenesis and functionality [31,32] as well as HSL activation, lipid breakdown and  $\beta$ -oxidation pathway [33,34].

Additionally, the enhanced reduction of lipid droplets observed with the gingerol mixture, in comparison to AICAR, might indicate a synergistic effect from various signaling pathways activated by gingerols. AICAR functions as a quick and temporary AMPK activator and serves as a benchmark to confirm AMPK signaling activation; therefore, adipocytes were stimulated with AICAR for 60 minutes. Conversely, gingerol treatment likely activates both AMPK-dependent and independent pathways, necessitating an extended incubation period of 48 hours to fully harness the activities of gingerols in adipocytes. The results imply that gingerols function as multi-target agents with prolonged effects on the lipid metabolism of adipocytes (Fig 5). Together, these findings support a growing role for gingerols as modulators of energy metabolism and mitochondrial function through AMPK-dependent pathways. These findings underscore the potential of gingerols as multi-target therapeutic candidates for metabolic and cardiovascular diseases.

Dietary phenolic compounds, including resveratrol, epigallocatechins, berberine, curcumin, quercetin, and genistein, have been shown to modulate AMPK, promoting oxidative metabolism and reducing inflammation [35]. For instance, *Abelmoschus esculentus* (okra), which contains high levels of quercetin, enhances glucose and lipid profiles in diabetic rats by

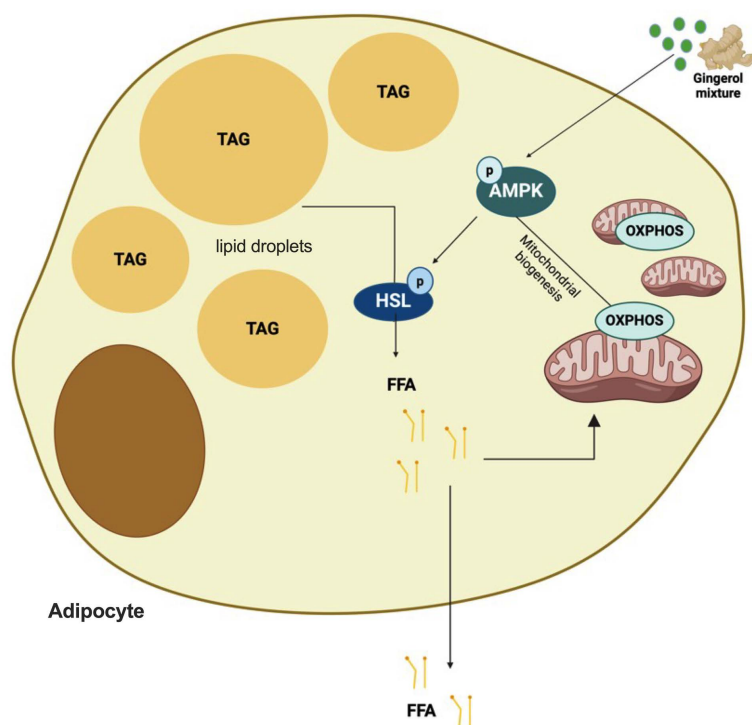

**Fig 5. Cellular mechanisms of ginger phenolic compounds on adipocytes.** A gingerol mixture (comprising 6-, 8-, and 10-gingerol, as well as 6-, 8-, and 10-shogaol) stimulates the activation of AMP-activated protein kinase (AMPK), which leads to enhanced mitochondrial biogenesis and oxidative phosphorylation (OXPHOS). Simultaneously, AMPK activation phosphorylates hormone-sensitive lipase (HSL), which catalyzes the breakdown of triglycerides (TAG) into free fatty acids (FFA). The liberated FFAs can be utilized in mitochondrial oxidation to support energy production or released into the culture medium.

<https://doi.org/10.1371/journal.pone.0326690.g005>

increasing AMPK activation while reducing PEPCK and HSL expression [36]. Similarly, adlay polyphenols extracted from *Coix lacryma-jobi* L. reduce lipid accumulation and improve lipid metabolism via the p-AMPK/p-ACC pathway in FFA-treated HepG2 cells, and lower body and liver weight, hepatic triglycerides, cholesterol, and serum glucose in high-fat diet-fed mice [37]. Hawthorn polyphenol microcapsules enhance skeletal muscle metabolism and antioxidant capacity in exercise-fatigued mice by activating AMPK and suppressing the NF- $\kappa$ B pathway [38]. Other polyphenols, such as honokiol and ferulic acid, have been shown to protect mitochondrial integrity and promote autophagy in models of acute kidney and liver injury through AMPK activation [39,40]. Additionally, pecan polyphenols improve AMPK activity in the skeletal muscle of obese mice, enhancing mitochondrial function, metabolic flexibility, and insulin sensitivity [41]. Chaya leaf extracts, rich in polyphenols, further support this trend by promoting mitochondrial bioenergetics and fatty acid oxidation in myotubes and hepatocytes via AMPK signaling [42]. These lines of evidence demonstrate that various plant polyphenols can activate AMPK, improving metabolic parameters. However, the specific effects of ginger-derived phenolic compounds—particularly gingerols and shogaols—on AMPK activity remain less explored. The present findings suggest that the gingerol–shogaol mixture modulates adipocyte metabolism at least in part, through AMPK activation, highlighting the potential of ginger root as a non-pharmacological approach to energy balance modulation.

Our findings underscore the potential of a gingerol mixture as promising coadjuvant in the treatment of metabolic diseases. By improving mitochondrial function, enhancing lipolysis, and reducing lipid accumulation, the gingerol mixture could play a crucial role in restoring metabolic homeostasis in adipose tissue. These results are particularly significant given the central role that mitochondrial dysfunction and lipid dysregulation play in obesity-related metabolic disorders (Fig 5). Thus, gingerol mixture represents a novel therapeutic strategy that could complement existing interventions for obesity management, potentially mitigating some of the adverse metabolic effects associated with this condition. The translatability of the present study depends on whether the dose of gingerols used to stimulate adipocytes can be achieved through a reasonable dietary intake of ginger. In this line, Suzanna M. Zick and colleagues evaluated the pharmacokinetic profile of 6-, 8-, and 10-gingerol, as well as 6-shogaol and their conjugate metabolites administered orally to healthy human volunteers. After ingestion of a 2g ginger extract standardized to 5% gingerols, they observed a plasma concentration of 1.69  $\mu$ g/mL for 6-gingerol, 0.23  $\mu$ g/mL for 8-gingerol, 0.53  $\mu$ g/mL for 10-gingerol, and 0.15  $\mu$ g/mL for 6-shogaol 30 minutes after oral dosing, reaching their T<sub>max</sub> between 45 and 120 min [43]. We treated adipocytes with 6  $\mu$ g/mL of the gingerol mixture. This concentration could be achieved by consuming 4 g of a ginger extract as in Zick et al. However, gingerols and shogaols may reach higher concentrations in the interstitial fluid within target tissue compared to serum [44]. Thus, it is likely that the dose of 2g ginger extract (or 5g of fresh ginger root) could achieve an interstitial gingerol concentration similar to that used in this study.

Despite the promising outcomes, this study has certain limitations that must be considered. The in vitro nature of the experiments restricts the generalizability of our findings to clinical settings. The study was performed only in inguinal (subcutaneous) adipocytes and not visceral. Since the aim of the study was to explore the mechanisms by which gingerols enhance mitochondrial activity, the rationale was that subcutaneous adipocytes have greater mitochondrial abundance and respiratory capacity than visceral adipocytes, which are more lipolytic but possess lower mitochondrial function [45]. While this model allowed us to study gingerol-induced AMPK activation and its impact on bioenergetics and lipolysis under functional conditions, future studies should address visceral adipocytes, particularly given their metabolic relevance in obesity. In prior work, we demonstrated that adipocytes derived from obese rats exhibit impaired mitochondrial function due to epigenetic alterations driven by the obesogenic environment [46]. Therefore, assessing gingerols in adipocytes from obese models is a logical next step. We also recognize the relevance of age-related changes; however, comparing adipocytes from young and old animals presents methodological challenges, as aging reduces the number and differentiation potential of adipose-derived mesenchymal stem cells. Despite this limitation, we are exploring strategies to address this question in future research. Further research, particularly in vivo studies, is required to confirm the effects of the gingerol mixture on mitochondrial function and lipid metabolism in human subjects. Moreover, elucidating the exact molecular

mechanisms through which gingerols activate AMPK and other metabolic pathways would provide valuable insights into their therapeutic potential. Future studies should also assess the long-term impact of gingerol supplementation in obesity models to better understand its efficacy and safety as an adjunct treatment.

## Conclusion

The gingerol mixture regulates energy metabolism in adipocytes by enhancing AMPK-mediated mitochondrial activity and promoting lipolysis, thereby preventing adipocyte hypertrophy and the energetic disturbances characteristic of obesity. Characterizing the cellular mechanisms involved in the beneficial effects of dietary compounds offers novel insights into nutritional intervention strategies aimed at preventing and managing obesity and related metabolic diseases.

## Supporting information

**S1\_raw\_images.** Raw images of immunoblots.  
(PDF)

## Acknowledgments

We would like to thank the members of CICUAL for their work in evaluating and monitoring research projects, and the members of DIEB, led by MVZ Mariela Guadalupe Contreras Escamilla, for their great work in the production and maintenance of research animals, as well as their support for training in the handling of laboratory animals.

## Author contributions

**Conceptualization:** María Elizabeth Preciado-Ortiz, Juan José Rivera-Valdés, Armando R. Tovar, Ivan Torre-Villalvazo, Erika Martínez-López.

**Data curation:** María Elizabeth Preciado-Ortiz, Ivan Torre-Villalvazo.

**Formal analysis:** María Elizabeth Preciado-Ortiz, Juan José Rivera-Valdés, Sarai Vásquez-Reyes, Armando R. Tovar, Ivan Torre-Villalvazo, Erika Martínez-López.

**Funding acquisition:** María Elizabeth Preciado-Ortiz, Juan José Rivera-Valdés, Erika Martínez-López.

**Investigation:** María Elizabeth Preciado-Ortiz, Berenice Pérez-Jiménez, Paulina Barrera-Gómez, Juan José Rivera-Valdés, Joshua Ayork Acevedo-Carabantes, Sarai Vásquez-Reyes, Armando R. Tovar, Ivan Torre-Villalvazo.

**Methodology:** María Elizabeth Preciado-Ortiz, Berenice Pérez-Jiménez, Paulina Barrera-Gómez, Joshua Ayork Acevedo-Carabantes, Sarai Vásquez-Reyes, Armando R. Tovar, Ivan Torre-Villalvazo.

**Project administration:** Ivan Torre-Villalvazo, Erika Martínez-López.

**Resources:** Juan José Rivera-Valdés, Armando R. Tovar, Nimbe Torres, Ivan Torre-Villalvazo, Erika Martínez-López.

**Software:** Ivan Torre-Villalvazo.

**Supervision:** Juan José Rivera-Valdés, Ivan Torre-Villalvazo.

**Validation:** Ivan Torre-Villalvazo.

**Visualization:** Ivan Torre-Villalvazo.

**Writing – original draft:** María Elizabeth Preciado-Ortiz, Juan José Rivera-Valdés, Ivan Torre-Villalvazo, Erika Martínez-López.

**Writing – review & editing:** María Elizabeth Preciado-Ortiz, Juan José Rivera-Valdés, Armando R. Tovar, Nimbe Torres, Ivan Torre-Villalvazo, Erika Martínez-López.

## References

- Luo L, Liu M. Adipose tissue in control of metabolism. *J Endocrinol*. 2016;231(3):R77–99. <https://doi.org/10.1530/JOE-16-0211> PMID: [27935822](#)
- Kahn CR, Wang G, Lee KY. Altered adipose tissue and adipocyte function in the pathogenesis of metabolic syndrome. *J Clin Invest*. 2019;129(10):3990–4000. <https://doi.org/10.1172/JCI129187> PMID: [31573548](#)
- O'Rourke RW. Adipose tissue and the physiologic underpinnings of metabolic disease. *Surg Obes Relat Dis*. 2018;14(11):1755–63. <https://doi.org/10.1016/j.soard.2018.07.032> PMID: [30193906](#)
- Heinonen S, Jokinen R, Rissanen A, Pietiläinen KH. White adipose tissue mitochondrial metabolism in health and in obesity. *Obes Rev*. 2020;21(2):e12958.
- Lee M, Lee M. The Effects of C3G and D3G Anthocyanin-Rich Black Soybean on Energy Metabolism in Beige-like Adipocytes. *J Agric Food Chem*. 2020;68(43):12011–8. <https://doi.org/10.1021/acs.jafc.0c04891> PMID: [33059446](#)
- Woo CY, Jang JE, Lee SE, Koh EH, Lee KU. Mitochondrial Dysfunction in Adipocytes as a Primary Cause of Adipose Tissue Inflammation. *Diabetes Metab J*. 2019;43(3):247–56. <https://doi.org/10.4093/dmj.2018.0221> PMID: [30968618](#)
- Lee JH, Park A, Oh K-J, Lee SC, Kim WK, Bae K-H. The Role of Adipose Tissue Mitochondria: Regulation of Mitochondrial Function for the Treatment of Metabolic Diseases. *Int J Mol Sci*. 2019;20(19):4924. <https://doi.org/10.3390/ijms20194924> PMID: [31590292](#)
- Lee G-H, Peng C, Jeong S-Y, Park S-A, Lee H-Y, Hoang T-H, et al. Ginger extract controls mTOR-SREBP1-ER stress-mitochondria dysfunction through AMPK activation in obesity model. *Journal of Functional Foods*. 2021;87:104628. <https://doi.org/10.1016/j.jff.2021.104628>
- Chen L, Qin Y, Liu B, Gao M, Li A, Li X, et al. Pgc-1 $\alpha$ -mediated mitochondrial quality control: molecular mechanisms and implications for heart failure. *Front Cell Dev Biol*. 2022. <https://doi.org/10.3389/fcell.2022.871357>
- Deng B, Jiang X-L, Xu Y-C, Chen S, Cai M, Deng S-H, et al. 10-Gingerol, a natural AMPK agonist, suppresses neointimal hyperplasia and inhibits vascular smooth muscle cell proliferation. *Food Funct*. 2022;13(6):3234–46. <https://doi.org/10.1039/d1fo03610f> PMID: [35213678](#)
- Liu Y, Liu J, Zhang Y. Research Progress on Chemical Constituents of Zingiber officinale Roscoe. *Biomed Res Int*. 2019;2019:5370823. <https://doi.org/10.1155/2019/5370823> PMID: [31930125](#)
- Suk S, Seo SG, Yu JG, Yang H, Jeong E, Jang YJ, et al. A bioactive constituent of ginger, 6-shogaol, prevents adipogenesis and stimulates lipolysis in 3T3-L1 adipocytes. *J Food Biochem*. 2016;40(1):84–90.
- Suk S, Kwon GT, Lee E, Jang WJ, Yang H, Kim JH, et al. Gingerenone A, a polyphenol present in ginger, suppresses obesity and adipose tissue inflammation in high-fat diet-fed mice. *Mol Nutr Food Res*. 2017;61(10):10.1002/mnfr.201700139. <https://doi.org/10.1002/mnfr.201700139> PMID: [28556482](#)
- Brahma Naidu P, Uddandao VVS, Ravindar Naik R, Suresh P, Meriga B, Begum MS, et al. Ameliorative potential of gingerol: Promising modulation of inflammatory factors and lipid marker enzymes expressions in HFD induced obesity in rats. *Mol Cell Endocrinol*. 2016;419:139–47. <https://doi.org/10.1016/j.mce.2015.10.007> PMID: [26493465](#)
- Saravanan G, Ponnurugan P, Deepa MA, Senthilkumar B. Anti-obesity action of gingerol: effect on lipid profile, insulin, leptin, amylase and lipase in male obese rats induced by a high-fat diet. *J Sci Food Agric*. 2014;94(14):2972–7. <https://doi.org/10.1002/jsfa.6642> PMID: [24615565](#)
- Li C, Zhou L. Inhibitory effect 6-gingerol on adipogenesis through activation of the Wnt/ $\beta$ -catenin signaling pathway in 3T3-L1 adipocytes. *Toxicol In Vitro*. 2015;30(1 Pt B):394–401. <https://doi.org/10.1016/j.tiv.2015.09.023> PMID: [26498061](#)
- Tzeng T-F, Liu I-M. 6-gingerol prevents adipogenesis and the accumulation of cytoplasmic lipid droplets in 3T3-L1 cells. *Phytomedicine*. 2013;20(6):481–7. <https://doi.org/10.1016/j.phymed.2012.12.006> PMID: [23369342](#)
- Preciado-Ortiz ME, Martínez-López E, Rodríguez-Echevarría R, Pérez-Robles M, Gembé-Olivarez G, Rivera-Valdés JJ. 10-Gingerol, a novel ginger compound, exhibits antiadipogenic effects without compromising cell viability in 3T3-L1 cells. *Biomed Rep*. 2023;19(6):1–7.
- Gembé-Olivarez G, Preciado-Ortiz ME, Campos-Perez W, Rodríguez-Reyes SC, Martínez-López E, Rivera-Valdés JJ. A mix of ginger phenols exhibits anti-adipogenic and lipolytic effects in mature adipocytes derived from 3T3-L1 cells. *Experimental and Therapeutic Medicine*. 2023;26(1):1–9.
- Santos AP, Rogero MM, Bastos DHM. Edible plants, their secondary metabolites and antiobesogenic potential. *Recent Pat Food Nutr Agric*. 2010;2(3):195–212. <https://doi.org/10.2174/2212798411002030195> PMID: [20858195](#)
- Vásquez-Reyes S, Velázquez-Villegas LA, Vargas-Castillo A, Noriega LG, Torres N, Tovar AR. Dietary bioactive compounds as modulators of mitochondrial function. *J Nutr Biochem*. 2021;96:108768. <https://doi.org/10.1016/j.jnutbio.2021.108768> PMID: [34000412](#)
- Takeda Y, Dai P. Capsaicin directly promotes adipocyte browning in the chemical compound-induced brown adipocytes converted from human dermal fibroblasts. *Sci Rep*. 2022;12(1):6612. <https://doi.org/10.1038/s41598-022-10644-8> PMID: [35459786](#)
- Palacios-González B, Vargas-Castillo A, Velázquez-Villegas LA, Vázquez-Reyes S, López P, Noriega LG, et al. Genistein increases the thermogenic program of subcutaneous WAT and increases energy expenditure in mice. *J Nutr Biochem*. 2019;68:59–68. <https://doi.org/10.1016/j.jnutbio.2019.03.012> PMID: [31030168](#)
- Nisha VM, Anusree SS, Priyanka A, Raghu KG. Apigenin and quercetin ameliorate mitochondrial alterations by tunicamycin-induced ER stress in 3T3-L1 adipocytes. *Appl Biochem Biotechnol*. 2014;174(4):1365–75. <https://doi.org/10.1007/s12010-014-1129-2> PMID: [25106896](#)
- Kim B, Kim H-J, Cha Y-S. The protective effects of steamed ginger on adipogenesis in 3T3-L1 cells and adiposity in diet-induced obese mice. *Nutr Res Pract*. 2021;15(3):279–93. <https://doi.org/10.4162/nrp.2021.15.3.279> PMID: [34093970](#)



26. Xia Q, Lu F, Chen Y, Li J, Huang Z, Fang K, et al. 6-Gingerol regulates triglyceride and cholesterol biosynthesis to improve hepatic steatosis in MAFLD by activating the AMPK-SREBPs signaling pathway. *Biomed Pharmacother.* 2024;170:116060. <https://doi.org/10.1016/j.biopha.2023.116060> PMID: 38147735
27. Liu Y, Li D, Wang S, Peng Z, Tan Q, He Q. 6-gingerol ameliorates hepatic steatosis, inflammation and oxidative stress in high-fat diet-fed mice through activating LKB1/AMPK signaling. *Int J Mol Sci.* 2023;24(7):6285.
28. Peng Z, Zeng Y, Zeng X, Tan Q, He Q, Wang S, et al. 6-Gingerol improves lipid metabolism disorders in skeletal muscle by regulating AdipoR1/AMPK signaling pathway. *Biomed Pharmacother.* 2024;180:117462. <https://doi.org/10.1016/j.biopha.2024.117462> PMID: 39316973
29. Han X, Yang Y, Zhang M, Chu X, Zheng B, Liu C, et al. Protective effects of 6-gingerol on cardiotoxicity induced by arsenic trioxide through AMPK/SIRT1/PGC-1 $\alpha$  signaling pathway. *Front Pharmacol.* 2022;13:868393.
30. Zhan Q-C, Liu Y-Z, Xi Y-M, Zeng Y, Tian J-Y, Liu L, et al. 6-Gingerol ameliorates adipose tissue insulin resistance in aging rats. *Zhongguo Zhong Yao Za Zhi.* 2022;47(6):1642–9. <https://doi.org/10.19540/j.cnki.cjcm.20211008.702> PMID: 35347963
31. Marin TL, Gongol B, Zhang F, Martin M, Johnson DA, Xiao H, et al. AMPK promotes mitochondrial biogenesis and function by phosphorylating the epigenetic factors DNMT1, RBBP7, and HAT1. *Sci Signal.* 2017;10(464):eaaf7478. <https://doi.org/10.1126/scisignal.aaf7478> PMID: 28143904
32. Malik N, Ferreira BI, Hollstein PE, Curtis SD, Trefts E, Weiser Novak S, et al. Induction of lysosomal and mitochondrial biogenesis by AMPK phosphorylation of FNIP1. *Science.* 2023;380(6642):eabj5559. <https://doi.org/10.1126/science.abj5559> PMID: 37079666
33. Kim J, Yang G, Kim Y, Kim J, Ha J. AMPK activators: mechanisms of action and physiological activities. *Exp Mol Med.* 2016;48(4):e224. <https://doi.org/10.1038/emm.2016.16> PMID: 27034026
34. Yan Q, Li C, Li J, Yao Y, Zhao J. Protective Effects of Isostrictinin Against High-Fat, High-Sugar Diet-Induced Steatosis in MASLD Mice via Regulation of the AMPK/SREBP-1c/ACC Pathway. *Nutrients.* 2024;16(22):3876. <https://doi.org/10.3390/nu16223876> PMID: 39599662
35. Gasparrini M, Giampieri F, Alvarez Suarez J, Mazzoni L, Forbes Hernandez TY, Quiles JL. AMPK as a new attractive therapeutic target for disease prevention: the role of dietary compounds AMPK and disease prevention. *Curr Drug Targets.* 2016;17(8):865–89.
36. Nasrollahi Z, ShahaniPour K, Monajemi R, Ahadi AM. Effect of quercetin and Abelmoschus esculentus (L.) Moench on lipids metabolism and blood glucose through AMPK- $\alpha$  in diabetic rats (HFD/STZ). *J Food Biochem.* 2022;46(12):e14506. <https://doi.org/10.1111/jfbc.14506> PMID: 36369969
37. Ma S, Yang B, Shi Y, Du Y, Lv Y, Liu J, et al. Adlay (Coix lacryma-jobi (L.) Polyphenol Improves Hepatic Glucose and Lipid Homeostasis through Regulating Intestinal Flora via AMPK Pathway. *Mol Nutr Food Res.* 2022;66(23):e2200447. <https://doi.org/10.1002/mnfr.202200447> PMID: 36214059
38. Yu J, Jiang W, Wang S, Liu S, Shi D, Wang H, et al. Microencapsulated hawthorn berry polyphenols alleviate exercise fatigue in mice by regulating AMPK signaling pathway and balancing intestinal microflora. *Journal of Functional Foods.* 2022;97:105255. <https://doi.org/10.1016/j.jff.2022.105255>
39. Mao RW, He SP, Lan JG, Zhu WZ. Honokiol ameliorates cisplatin-induced acute kidney injury via inhibition of mitochondrial fission. *Br J Pharmacol.* 2022;179(14):3886–904.
40. Wu J, Zhou F, Fan G, Liu J, Wang Y, Xue X, et al. Ferulic acid ameliorates acetaminophen-induced acute liver injury by promoting AMPK-mediated protective autophagy. *IUBMB Life.* 2022;74(9):880–95. <https://doi.org/10.1002/iub.2625> PMID: 35514074
41. Delgadillo-Puga C, Torre-Villalvazo I, Noriega LG, Rodríguez-López LA, Alemán G, Torre-Anaya EA, et al. Pecans and Its Polyphenols Prevent Obesity, Hepatic Steatosis and Diabetes by Reducing Dysbiosis, Inflammation, and Increasing Energy Expenditure in Mice Fed a High-Fat Diet. *Nutrients.* 2023;15(11):2591. <https://doi.org/10.3390/nu15112591> PMID: 37299553
42. Avila-Nava A, Acevedo-Carabantes JA, Alamilla-Martinez I, Tobón-Cornejo S, Torre-Villalvazo I, Tovar AR, et al. Chaya (Cnidoscolus aconitifolius (Mill.) I.M. Johnston) leaf extracts regulate mitochondrial bioenergetics and fatty acid oxidation in C2C12 myotubes and primary hepatocytes. *J Ethnopharmacol.* 2023;312:116522. <https://doi.org/10.1016/j.jep.2023.116522> PMID: 37080365
43. Zick SM, Djuric Z, Ruffin MT, Litzinger AJ, Normolle DP, Alrawi S, et al. Pharmacokinetics of 6-gingerol, 8-gingerol, 10-gingerol, and 6-shogaol and conjugate metabolites in healthy human subjects. *Cancer Epidemiol Biomark Prev Publ Am Assoc Cancer Res Cosponsored Am Soc Prev Oncol.* 2008;17(8):1930–6.
44. Jiang S, Wang N, Mi S. Plasma pharmacokinetics and tissue distribution of [6]-gingerol in rats. *Biopharm Drug Dispos.* 2008;29(9):529–37. <https://doi.org/10.1002/bdd.638> PMID: 19051331
45. Schöttl T, Kappler L, Braun K, Fromme T, Klingenspor M. Limited mitochondrial capacity of visceral versus subcutaneous white adipocytes in male C57BL/6N mice. *Endocrinology.* 2015;156(3):923–33. <https://doi.org/10.1210/en.2014-1689> PMID: 25549046
46. Pérez B, Torre-Villalvazo I, Wilson-Verdugo M, Lau-Corona D, Muciño-Olmos E, Coutiño-Hernández D, et al. Epigenetic reprogramming of H3K4me3 in adipose-derived stem cells by HFS diet consumption leads to a disturbed transcriptomic profile in adipocytes. *Am J Physiol Endocrinol Metab.* 2024;327(1):E13–26. <https://doi.org/10.1152/ajpendo.00093.2024> PMID: 38717362
